# Supplementary material
Source: publisher figshare collection journal article supplement (https://acs.figshare.com/ndownloader/files/4382839)
Supplement: Supplementary file 1 [file 4382839]

## Supporting Information

### Acid-Catalyzed and Solvolytic Desulfation of H<sub>2</sub>SO<sub>4</sub>-Hydrolyzed Cellulose Nanocrystals

Feng Jiang,<sup>†</sup> Alan R. Esker,<sup>‡</sup> and Maren Roman<sup>\*,†</sup>

<sup>†</sup>Macromolecules and Interfaces Institute and Department of Wood Science and Forest Products, Virginia Polytechnic Institute and State University, Blacksburg, VA 24061, USA,

<sup>‡</sup>Macromolecules and Interfaces Institute and Department of Chemistry, Virginia Polytechnic Institute and State University, Blacksburg, VA 24061, USA

\* Corresponding author. E-mail: maren.roman@vt.edu; Tel: +540-231-1421; Fax: +540-231-8176.

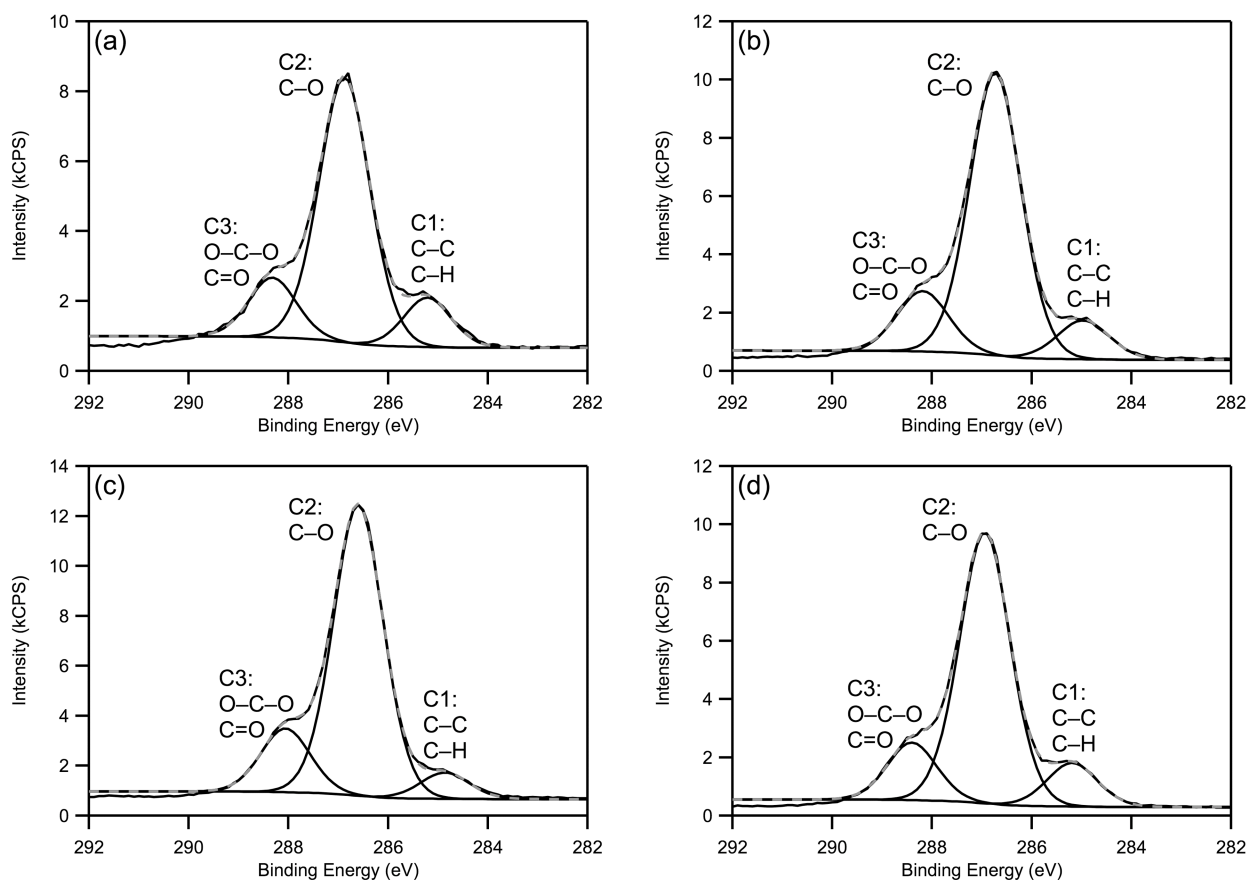

**Figure S1.** High-resolution C 1s photoelectron spectra of the CNC samples SH (a), HH (b), HD7 (c), and SD (d).

**Table S1.** Relative amounts of C1, C2, and C3 carbon species and C2/C3 ratios for different CNC samples

| Sample    | Percentage of C 1s peak area |                    |                    | C2/C3 |
|-----------|------------------------------|--------------------|--------------------|-------|
|           | C1                           | C2                 | C3                 |       |
| SH        | 12.52                        | 72.24              | 15.24              | 4.74  |
| HH        | 10.27                        | 73.95              | 15.78              | 4.69  |
| HD7       | 6.74                         | 76.64              | 16.62              | 4.61  |
| SD        | 11.71                        | 73.20              | 15.09              | 4.85  |
| Cellulose | 0.00                         | 83.00 <sup>a</sup> | 17.00 <sup>a</sup> | 4.88  |

<sup>a</sup> from ref 1

## References

- (1) Ahmed, A.; Adnot, A.; Grandmaison, J. L.; Kaliaguine, S.; Doucet, J. *Cellulose Chem. Technol.* **1987**, *21*, 483–492.
